# Supplementary material for: Clearance of&nbsp;Inflammatory Cytokines in Patients with Septic Acute Kidney Injury During Renal Replacement Therapy Using the EMiC2 Filter (Clic-AKI Study)
Source: Research Square preprint supplement (doi:10.21203/rs.3.rs-111266/v1), 2020-11-20
Supplement: Supplementary file 1 [file 54f8672834bfc84992397304.docx]

**Additional Files**

**Additional file 1.** Sites of sampling from the CVVHD circuit

(A) Pre-dialyzer sampling port, (B) Post-dialyzer sampling port, (C) Effluent fluid sampling port


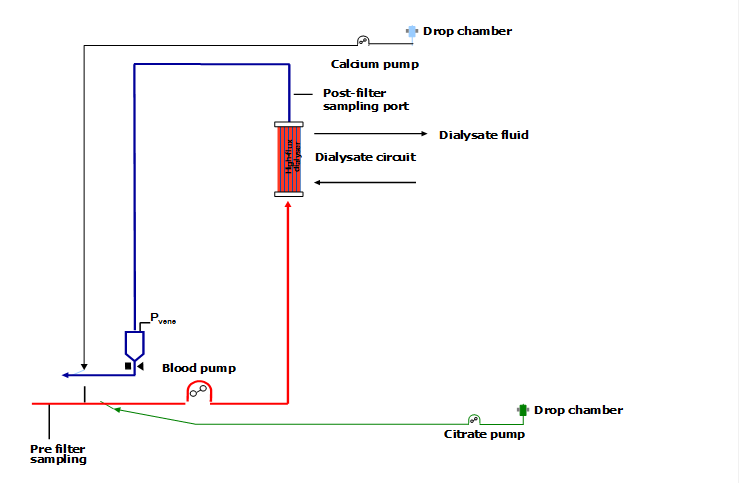


(A) Pre-dialyzer sampling port

(B) Post-dialyzer sampling port

(C) Effluent fluid sampling port

**Additional file 2** Reduction ratio of cytokine concentrations at t = 1 (n=12), 6 (n=12), 24 (n=11), and 48 (n=7) hours compared with baseline pre-filter concentrations (%)

| **Cytokines** | **T0-T1 (%)** | **T0-T6 (%)** | **T0-T24 (%)** | **T0-T48 (%)** |
| --- | --- | --- | --- | --- |
| IL-2 | -21.15  (-62.57, 20.27) | -38.01  (-93.36, 17.34) | -39.44  (-100.89, 22.02) | -9.43  (-143.64, 124.78) |
| IL-4 | 7.80  (-13.75, 29.35) | 3.03  (-17.13, 23.19) | 1.76  (-23.18, 26.71) | -13.46  (-29.25, 2.34) |
| IL-6 | 39.06  (-30.24, 108.36) | 26.68  (-50, 103.36) | -11.45  (-61.09, 38.19) | -24.50  (-146.34, 97.34) |
| IL-8 | 14.66  (-91.26, 120.59) | 48.98  (-133.75, 231.70) | 0.09  (-78.78, 78.97) | -58.93  (-84.20, -33.67) |
| IL-10 | 72.12  (-83.07, 227.32) | 56.92  (-84.44, 198.29) | 2.58  (-70.02, 75.17) | -43.04  (-90.02, 3.94) |
| VEGF | -26.47  (-59.58, 6.64) | -28.98  (-56.01, -1.94) | -14.42  (-53.64, 24.80) | -34.88  (-70.67, 0.91) |
| IFN-ƴ | -14.43  (-60.85, 31.99) | -15.74  (-89.63, 58.15) | -54.46  (-99.65, -9.27) | -61.02  (-107.25, -14.79) |
| TNF-α | -21.70  (-45.31, 1.91) | -20.88  (-55.25, 13.50) | -36.93  (-63.39, -10.47) | -47.18  (-74.91, -19.46) |
| IL-1α | -41.63  (-97.79, 14.54) | -52.55  (-97.43, -7.67) | -35.69  (-100.01, 28.64) | -50.98  (-106.86, 4.90) |
| IL-1β | -27.17  (-78.40, 24.06) | -3.73  (-84.92, 77.45) | -46.82  (-95.60, 1.97) | -54.04  (-128.93, 20.85) |
| MCP-1 | -8.73  (-28.98, 11.52) | -20.51  (-42.61, 1.59) | -30.48  (-49.41, -11.55) | -59.94  (-75.33, -44.55) |
| EGF | -42.42  (-86.47, 1.63) | -22.63  (-58.92, 13.66) | -0.78  (-32.63, 31.08) | 61.74  (-209.90, 333.38) |

Notes: Values expressed as median (interquartile range)

**Abbreviations:** IL, interleukin; VEGF, vascular endothelial growth factor; IFN, interferon; TNF, tumor necrosis factor; MCP, monocyte chemoattractant protein; EGF, epidermal growth factor

**Additional file 3** Sieving coefficient (SC) over time and mean SC (± standard error) for each cytokine

| **Cytokines** | **T1 (n=12)** | **T6 (n=10)** | **T24 (n=11)** | **T48 (n=6)** | **Mean ± S.E.** |
| --- | --- | --- | --- | --- | --- |
| IL-2  (n=6) | 0.22 ± 0.34 | 0 ± 0 | 0 ± 0 | 0 ± 0 | 0.06 ± 0.04 |
| IL-4 (n=12) | 1.34 ± 0.46 | 1.33 ± 0.37 | 1.32 ± 0.38 | 1.47 ± 0.45 | 1.35 ± 0.06 |
| IL-6  (n=12) | 0.33 ± 0.27 | 0.27 ± 0.28 | 0.28 ± 0.36 | 0.08 ± 0.08 | 0.26 ± 0.05 |
| IL-8  (n=12) | 0.90 ± 0.34 | 1.59 ± 1.24 | 1.65 ± 1.26 | 2.42 ± 3.68 | 1.52 ± 0.27 |
| IL-10  (n=12) | 0.12 ± 0.19 | 0.05 ± 0.09 | 0.05 ± 0.09 | 0.33 ± 0.33 | 0.11 ± 0.03 |
| VEGF  (n=11) | 0.33 ± 0.67 | 0.42 ± 0.77 | 0.04 ± 0.11 | 0.25 ± 0.43 | 0.26 ± 0.09 |
| IFN-ƴ  (n=7) | 0.08 ± 0.22 | 0.13 ± 0.32 | 0.23 ± 0.57 | 0 ± 0 | 0.13 ± 0.07 |
| TNF-α  (n=12) | 0.24 ± 0.22 | 0.44 ± 0.28 | 0.55 ± 0.28 | 0.54 ± 0.33 | 0.42 ± 0.05 |
| IL-1α  (n=6) | 0.11 ± 0.26 | 0.86 ± 1.49 | 0.22 ± 0.33 | 0.11 ± 0.23 | 0.33 ± 0.18 |
| IL-1β  (n=9) | 0.31 ± 0.54 | 0.45 ± 0.98 | 1.16 ± 2.22 | 0 ± 0 | 0.57 ± 0.26 |
| MCP-1  (n=12) | 0.90 ± 0.24 | 0.81 ± 0.33 | 0.74 ± 0.28 | 0.78 ± 0.48 | 0.81 ± 0.05 |
| EGF  (n=5) | 0 ± 0 | 0.17 ± 0.42 | 0 ± 0 | 0 ± 0 | 0.05 ± 0.05 |

Values expressed as mean ± standard deviation

**Abbreviations:** IL, interleukin; VEGF, vascular endothelial growth factor; IFN, interferon; TNF, tumor necrosis factor; MCP, monocyte chemoattractant protein; EGF, epidermal growth factor

**Additional file 4** Scatter plot and linear regression diagram showing the relation of sieving coefficient with molecular weights of analyzed cytokines and time


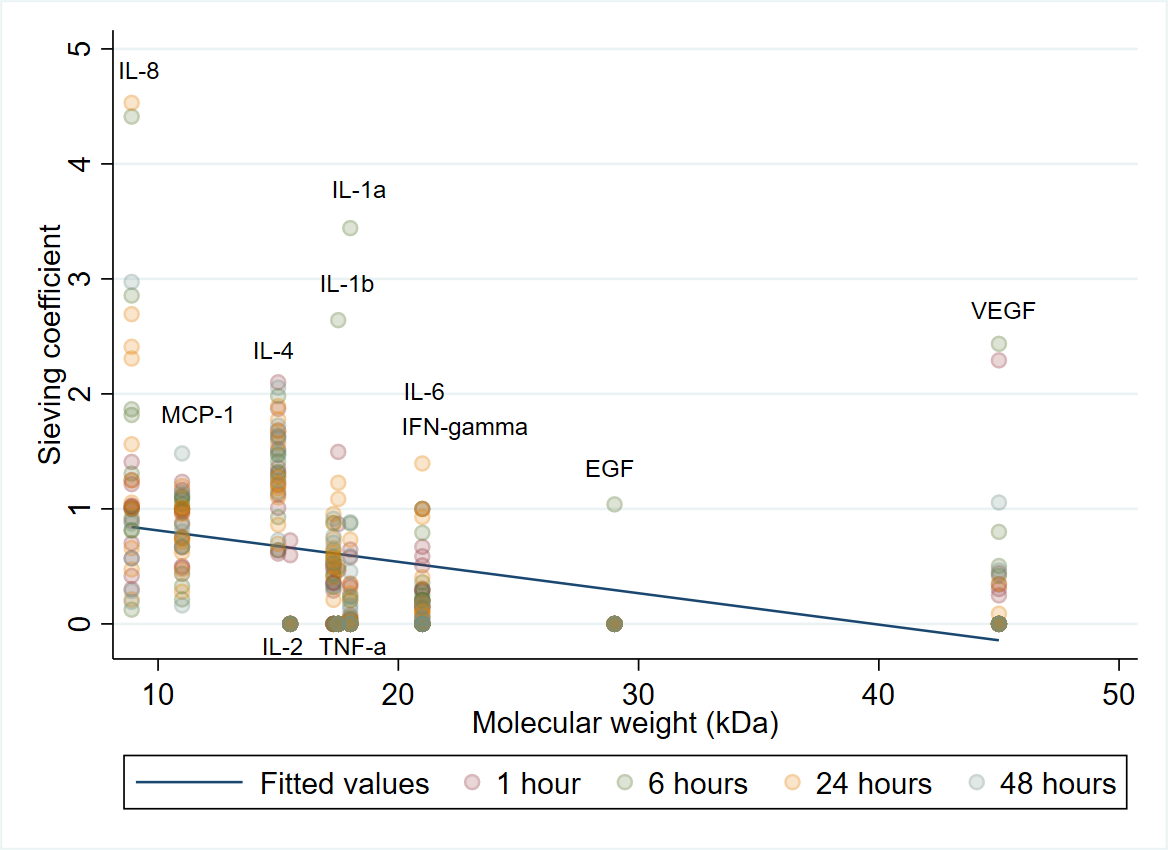


**Abbreviations:** IL, interleukin; VEGF, vascular endothelial growth factor; IFN, interferon; TNF, tumor necrosis factor; MCP, monocyte chemoattractant protein; EGF, epidermal growth factor

**Additional file 5** Clearance rates (mL/min) of cytokines by adsorption (pink bars) and effluent (blue bars) over time visualized as box and whisker plots (horizontal bars indicate median values).

Comparison between clearance rates at each time point and t = 1 hour were indicated by the asterisks (*) for statistical significance (P < 0.05).


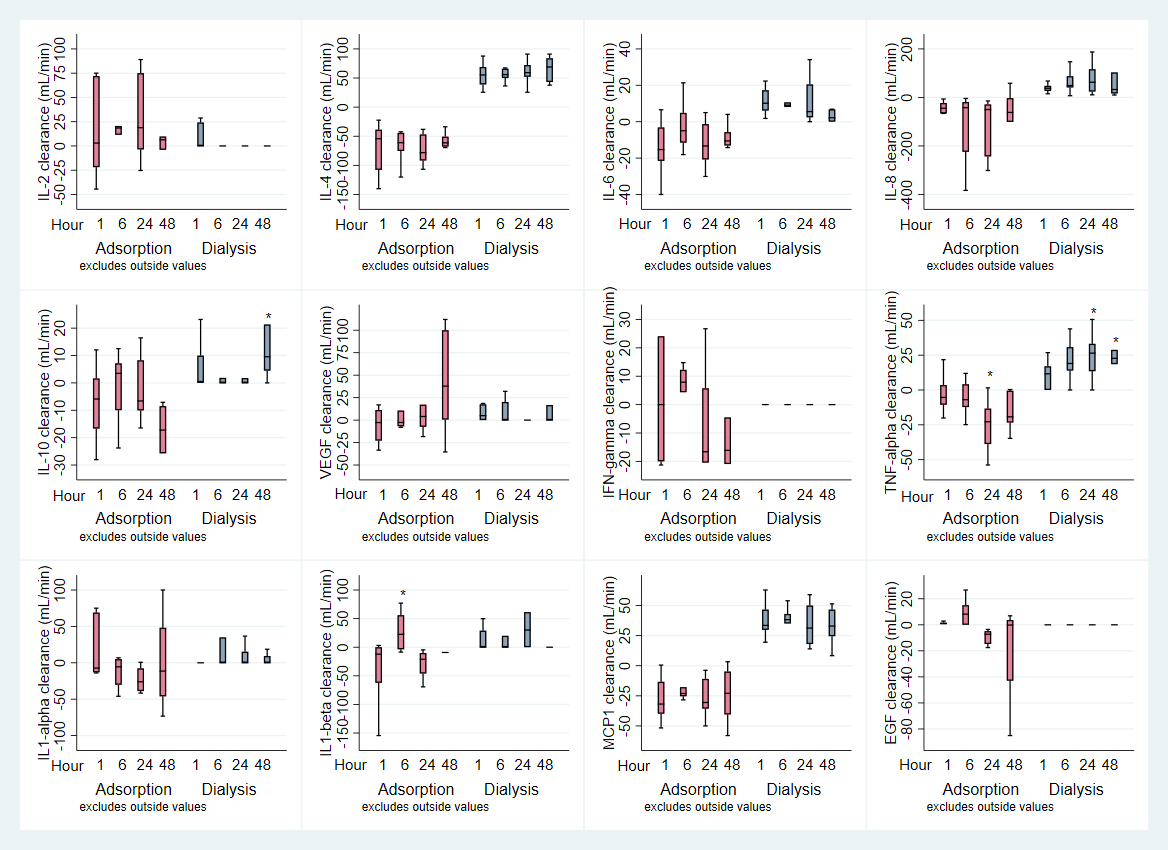


**Abbreviations:** IL, interleukin; VEGF, vascular endothelial growth factor; IFN, interferon; TNF, tumor necrosis factor; MCP, monocyte chemoattractant protein; EGF, epidermal growth factor

**Additional file 6** Spearman's correlation between serum levels and clearances by adsorption and effluent

| **Cytokines** | **Adsorption** | **P value** | **Effluent** | **P value** |
| --- | --- | --- | --- | --- |
| IL-2 | -0.52 | 0.03 | 0.35 | 0.17 |
| IL-4 | 0.52 | 0.0008 | -0.71 | <0.001 |
| IL-6 | -0.53 | 0.0005 | 0.54 | 0.0004 |
| IL-8 | 0.18 | 0.28 | -0.09 | 0.57 |
| IL-10 | 0.29 | 0.01 | -0.15 | 0.37 |
| VEGF | 0.08 | 0.65 | 0.22 | 0.20 |
| IFN-ƴ | 0.12 | 0.60 | 0.22 | 0.35 |
| TNF-α | 0.12 | 0.45 | 0.23 | 0.16 |
| IL-1α | -0.56 | 0.02 | 0.28 | 0.26 |
| IL-1β | -0.10 | 0.67 | 0.50 | 0.03 |
| MCP-1 | -0.24 | 0.14 | 0.008 | 0.96 |
| EGF | 0.06 | 0.77 | -0.32 | 0.13 |

**Abbreviations:** IL, interleukin; VEGF, vascular endothelial growth factor; IFN, interferon; TNF, tumor necrosis factor; MCP, monocyte chemoattractant protein; EGF, epidermal growth factor

**Additional file 7** Mass balances for all cytokines (pg/min): Mass removal rate by adsorption (Mad), mass removal rate by dialysis (Mdf), and total mass removal rate (Mt)

| **Cytokines** | **Mass removal rate (pg/min)** | **T1** | **T6** | **T24** | **T48** |
| --- | --- | --- | --- | --- | --- |
| IL-2  (n=6) | Adsorption | 8.7  (-145.7, 174.2) | 54.0  (43.7, 109.1) | 55  (-23.9, 224.3) | 17.3  (-49.4, 46.4) |
|  | Dialysis | 0 (0,0) | 0 (0, 0) | 0 (0, 0) | 0 (0, 0) |
|  | Total | 18.4  (-6.2, 174.2) | 48.8  (20.0, 81.5) | 55  (-23.9, 224.3) | 17.3  (-49.4, 46.4) |
| IL-4  (n=12) | Adsorption | -82.3  (-139.7, -60.7) | -78.5  (-83.9, -73.9) | -92.7  (-109.4, -84.3) | -68.4  (-82.7, -65.9) |
|  | Dialysis | 83.2  (71.8, 94.0) | 87.2  (71, 100.2) | 90.2  (63.1, 103.3) | 84.2  (77.6, 97.5) |
|  | Total | 4.7  (-29.9, 22.9) | -0.9  (-5.9, 11.6) | -15  (-32.8, 2.9) | 5.6  (-6.1, 14.7) |
| IL-6  (n=12) | Adsorption | -970.3  (-19423, -92.8) | -50.2  (-1694, 182) | -298.1  (-11390.8, -31.7) | -672.3  (-1380, -125.6) |
|  | Dialysis | 616.0  (257.7, 19227.5) | 530.6  (60.2, 6608) | 346.5 (69.9, 1742.6) | 224.6  (0, 266.2) |
|  | Total | 0  (-388.5, 469.6) | 219.3  (-3.9, 944) | 0  (-933.4, 228.5) | -684.9  (-1009.9, 5.6) |
| IL-8  (n=12) | Adsorption | -4810.2  (-12008, -1565) | -5352.1  (-30014.1, -654.6) | -5129.8  (-26834, -1061) | -1856.8  (-3903.6, -221) |
|  | Dialysis | 3255.3 (721.3, 12400.5) | 13256.8 (690.4, 16850.8) | 3490  (470.7, 17956.9) | 1763.5  (326, 3149.8) |
|  | Total | -345.6  (-2621.7, 864.8) | -128.5  (-3322.9, 3990.8) | -1.7  (-2187, 240) | 38.3  (-1373, 558.4) |
| IL-10  (n=12) | Adsorption | -34.8  (-145.5, 45.5) | 28.8  (-12.9, 71.7) | -12.3  (-95.6, 19.3) | -54.5  (-95.2, -37.8) |
|  | Dialysis | 19  (0, 75.9) | 0  (0, 47.3) | 0  (0, 43.2) | 35.5  (32.6, 66.3) |
|  | Total | -9.6  (-94.9, 114.2) | 24.2  (-14.6, 70) | 7.1  (-95.6, 51) | -19.3  (-53.8, -13.0) |
| VEGF  (n=9) | Adsorption | -155.8  (-875.6, 371.3) | -35.3  (-174.8, 347.6) | 122.4  (-129.8, 1672.7) | 930.5  (16.3, 1615) |
|  | Dialysis | 0 (0, 610.2) | 0 (0, 610) | 0 (0, 0) | 0 (0, 551.5) |
|  | Total | 371.3  (-580.9, 748.1) | 202  (-35.3, 347.9) | 122.5  (-44.3, 1672.7) | 1068.6 (85.5, 1615.0) |
| IFN-ƴ  (n=12) | Adsorption | 0 (-38.9, 11.1) | 0 (0, 24.6) | 0 (-38.6, 0) | -3.6 (-23.5, 0) |
|  | Dialysis | 0 (0, 0) | 0 (0, 0) | 0 (0, 0) | 0 (0, 0) |
|  | Total | 0 (0, 15.4) | 0 (0, 26.9) | 0 (-38.6, 0) | 0 (-23.5, 0) |
| TNF-α  (n=12) | Adsorption | -19.6  (-69.6, 33.6) | -25.2  (-135.9, 27.8) | -109.4  (-207.5, -39.8) | -67.7  (-109.0, -1.4) |
|  | Dialysis | 63.3  (0, 164.4) | 89.4  (54.7, 208.4) | 102.9  (57.9, 226.8) | 87.2  (79.3, 109.0) |
|  | Total | 78.2  (-5.3, 137.3) | 56.0  (1.5, 266.4) | 40  (-151.8, 86.5) | 43.1  (-1.4, 57.6) |
| IL-1α  (n=6) | Adsorption | -12.7  (-21.3, 32.4) | -5.9  (-75, 6.2) | -48.9  (-85.2, -21.7) | -13.4  (-56.8, 22.7) |
|  | Dialysis | 0 (0, 0) | 0 (0, 0) | 0 (0, 23.3) | 0 (0,0) |
|  | Total | 13.0  (-21.3, 40.3) | 6.1  (-17.9, 35.8) | -14.9  (-73.5, 23.8) | -13.4  (-40.2, 22.7) |
| IL-1β  (n=7) | Adsorption | -73.1  (-102.1, 0) | 36.1  (-9.0, 77.8) | -44.3  (-56.2, -12.3) | -19.7* |
|  | Dialysis | 0 (0, 43.5) | 0 (0, 0) | 0 (0, 51.0) | 0 (0, 0) |
|  | Total | 0  (-15.1, 38.3) | 77.8  (27.7, 115.1) | -6.8  (-12.3, -5.2) | 12.9  (-19.7, 45.6) |
| MCP-1  (n=12) | Adsorption | -12760.7  (-20902, -6595) | -8610.1  (-14341, -6946.3) | -6161.9  (-19019.5, -2951) | -5894.2  (-13309, -493) |
|  | Dialysis | 17960 (12613, 23547) | 15053 (11945, 21341.2) | 9507.2  (6255.7, 16095) | 9416.6 (2561, 12709) |
|  | Total | 2608.3  (0, 8393) | 4985.3 (2009.8, 6719.9) | 1905.8  (0, 3304.5) | 1598.1  (-3683.4, 2948) |
| EGF  (n=5) | Adsorption | 2.2 (1.4, 3) | 15.4 (0, 23.4) | -14.2 (-23.2, -7.9) | 0.9 (-79.0, 7.7) |
|  | Dialysis | 0 (0, 0) | 0 (0, 0) | 0 (0, 0) | 0 (0, 0) |
|  | Total | 2.2 (1.4, 3) | 8.4 (-2.8, 23.4) | -14.2 (-23.2, -7.9) | 0.9 (-79.0, 7.7) |

*only one observation

Notes: Values expressed as median (interquartile range)

**Abbreviations:** IL, interleukin; VEGF, vascular endothelial growth factor; IFN, interferon; TNF, tumor necrosis factor; MCP, monocyte chemoattractant protein; EGF, epidermal growth factor
